# Supplementary material
Source: publisher site journal article supplement (http://www.spandidos-publications.com/6230/downloadSupplementary)
Supplement: Supplementary file 1 [file downloadSupplementary]

## Sheet: Sheet1
Table SV. The RBP genes associated with both NONHSAG037054.2 and GABPA
symbol
ABCE1
AGFG1
AGO3
API5
BCLAF1
BZW1
C1D
CCDC59
CCNT2
CDC40
CLK1
CLK4
CNOT2
CNOT4
CNOT6L
CNOT7
CNOT8
CPEB2
CPSF6
CRNKL1
CWC15
CWC22
DCP2
DDX1
DDX21
DDX50
DHX15
DHX29
DIMT1
DNAJC21
DNTTIP2
DUS2
EED
EIF1B
EIF2S1
EIF2S2
EIF3J
EIF3M
EIF4E
ERI1
ESF1
EXOSC8
FASTKD2
FIP1L1
FMR1
FUBP1
FXR1
GFM2
GUF1
HBS1L
HINT3
HNRNPA2B1
HNRNPA3
HNRNPC
HNRNPD
HNRNPH3
HNRNPU
HTATSF1
INTS6
IPO7
KIN
KRR1
LARP1B
LARP4
LRPPRC
LSM5
MBNL1
METTL5
MPHOSPH6
MRPL1
MRPL13
MRPL3
MRPL32
MRPL39
MRPL50
MRPS18C
MRPS22
NARS
NIFK
NOC3L
NOL11
NSA2
NUDT21
NUFIP1
NUFIP2
PAPD4
PAPOLA
PCF11
PNRC2
PPWD1
PRPF18
PRPF38B
PRPF39
PRPF40A
PRPF4B
PSIP1
PTBP2
PTBP3
PUS7L
QKI
R3HCC1L
RBM12
RBM12B
RBM25
RBM27
RBM39
RBMS1
RIOK2
RNMT
RNPC3
RPL14
RPS20
RPS27L
RRP15
RTCA
SCAF11
SERBP1
SFPQ
SLTM
SMAD2
SMAD4
SMAD5
SNRNP48
SNRPB2
SREK1
SRFBP1
SRP72
SRSF1
SRSF10
SRSF11
SRSF3
SRSF6
SRSF7
SSB
STAU2
SUB1
SUZ12
SYNCRIP
TDRD3
TFAM
THUMPD1
THUMPD2
TIA1
TIAL1
TNPO1
TRA2B
TRMT13
TRNT1
TROVE2
TSEN15
TSN
TSNAX
U2SURP
UPF2
UTP18
UTP23
UTP3
WBP4
WDR12
WDR3
WDR36
YTHDC1
YTHDC2
YTHDF3
ZC3H12C
ZC3H13
ZC3H15
ZCCHC9
ZFC3H1
ZFR
ZNF326
ZNF638
ZRANB2
